# Supplementary material for: Biogeographic Population Structure of Chimeric Blades of Porphyra in the Northeast Atlantic Reveals Southern Rich Gene Pools, Introgression and Cryptic Plasticity
Source: Frontiers journal article supplement (doi:10.3389/fpls.2022.818368), 2022-02-24

SUPPLEMENTARY FIGURE 3

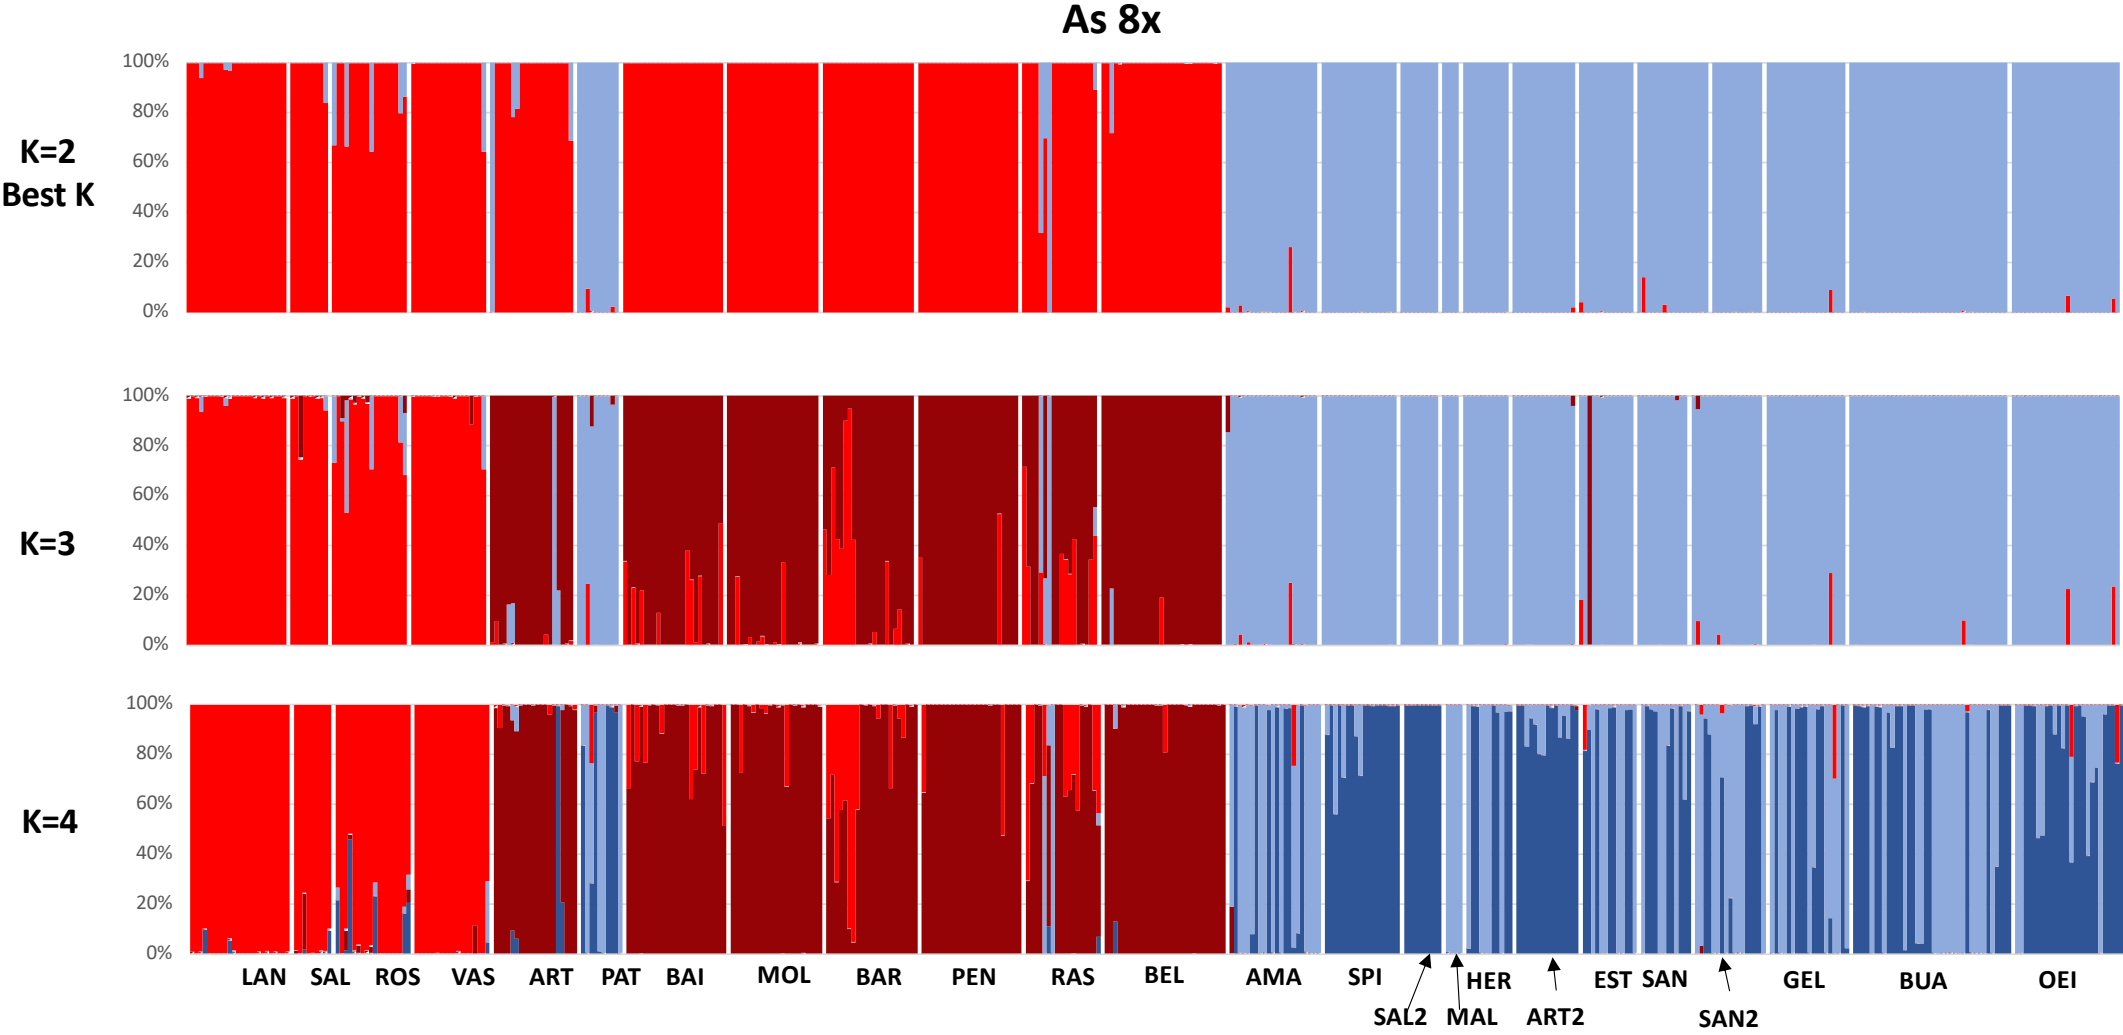

Supplement: Image_3.pdf [file Image_3.pdf]
